# Supplementary material for: The INGENIOUS project: towards understanding air pollution in homes
Source: Royal Society of Chemistry journal article supplement (doi:10.1039/d4em00634h), 2025-01-01
Supplement: d4em00634h1.pdf [file d4em00634h1.pdf]

## Supplementary Information: Carslaw et al. (2024)

**Table S1:** Summary of chemical instrumentation used for WPs1-3

| Pollutant                                                                                                                                                                                                                                                                                                                                                                                                                                                                       | Instrument                                                   | Offline/<br>online | WP  |
|---------------------------------------------------------------------------------------------------------------------------------------------------------------------------------------------------------------------------------------------------------------------------------------------------------------------------------------------------------------------------------------------------------------------------------------------------------------------------------|--------------------------------------------------------------|--------------------|-----|
| Alkenes inc. total terpenes, aromatics, HCHO & other OVOC                                                                                                                                                                                                                                                                                                                                                                                                                       | SIFT-MS, <i>Syft Technologies VOICE Ultra</i>                | On                 | 1,3 |
| Speciated terpenes                                                                                                                                                                                                                                                                                                                                                                                                                                                              | GC-MS (6850/5975C quadrupole, Agilent Technologies)          | Off                | 1   |
| Alkanes, alkenes (inc. speciated terpenes), aromatics, OVOC                                                                                                                                                                                                                                                                                                                                                                                                                     | GC-TOF-MS, <i>Agilent 6890N/Almsco</i>                       | Off                | 1,3 |
| Alkanes, alkenes, speciated monoterpenes/monoterpenoids, aromatics, OVOCs, chlorinated hydrocarbons, cyclosiloxanes                                                                                                                                                                                                                                                                                                                                                             | GC-FID-QMS (7890A, 5977A, Agilent Technologies)              | Off                | 2   |
| O <sub>3</sub> , CO (Zephyr only), CO <sub>2</sub> (AQMesh only) NO, NO <sub>2</sub> , PM <sub>1</sub> , PM <sub>2.5</sub> , PM <sub>10</sub>                                                                                                                                                                                                                                                                                                                                   | Low-cost sensor network (Zephyr and AQMesh)                  | On                 | 1,2 |
| Chemically speciated PM                                                                                                                                                                                                                                                                                                                                                                                                                                                         | UHPLC-Orbitrap-MS; Aerodyne HR-AMS and FIGAERO-I-CIMS        | Off                | 1,2 |
| Semi-volatile organics                                                                                                                                                                                                                                                                                                                                                                                                                                                          | 2D-GC-TOF-MS                                                 | Off                | 1,2 |
| NO, NO <sub>2</sub> , CO <sub>2</sub>                                                                                                                                                                                                                                                                                                                                                                                                                                           | AirXY ICAD NO <sub>x</sub> & in-built CO <sub>2</sub> sensor | On                 | 1,3 |
| SIFT=selective ionisation flow-tube; MS=mass spectrometry; GC=Gas Chromatography; TOF=time of flight; FID= flame ionisation detection; QMS=quadrupole mass spectrometry; OVOC=oxygenated VOC; UHPLC=Ultra-high pressure liquid chromatography; HR-AMS=High Resolution Aerosol MS; FIGAERO-I-CIMS=Filter Inlet for Gases and Aerosols, coupled to Chemical Ionisation MS (with iodide ions); ICAD=iterative cavity enhanced DOAS (differential optical absorption spectroscopy). |                                                              |                    |     |

### AirGradient Sensors

The AirGradient (AirGradient, n.d.) integrates a series of sensors: a SenseAir S8 using non-dispersive infrared technology to measure CO<sub>2</sub> concentration (parts per million by volume (ppm)); a Plantower PMS5003 sensor with laser scattering technology to measure three size fractions of PM concentration (PM<sub>1</sub>, PM<sub>2.5</sub>, PM<sub>10</sub> in  $\mu\text{g}/\text{m}^3$ ); and a Sensirion SHT3x/4x sensor to measure temperature and relative humidity. The platforms also integrate a Sensirion SGP41 sensor to measure total volatile organic compounds (TVOCs) concentrations (parts per billion by volume (ppb)); however, due to the complexity of quantifying TVOCs with metal oxide sensors, these measurements were only used as a qualitative indicator of indoor emissions.

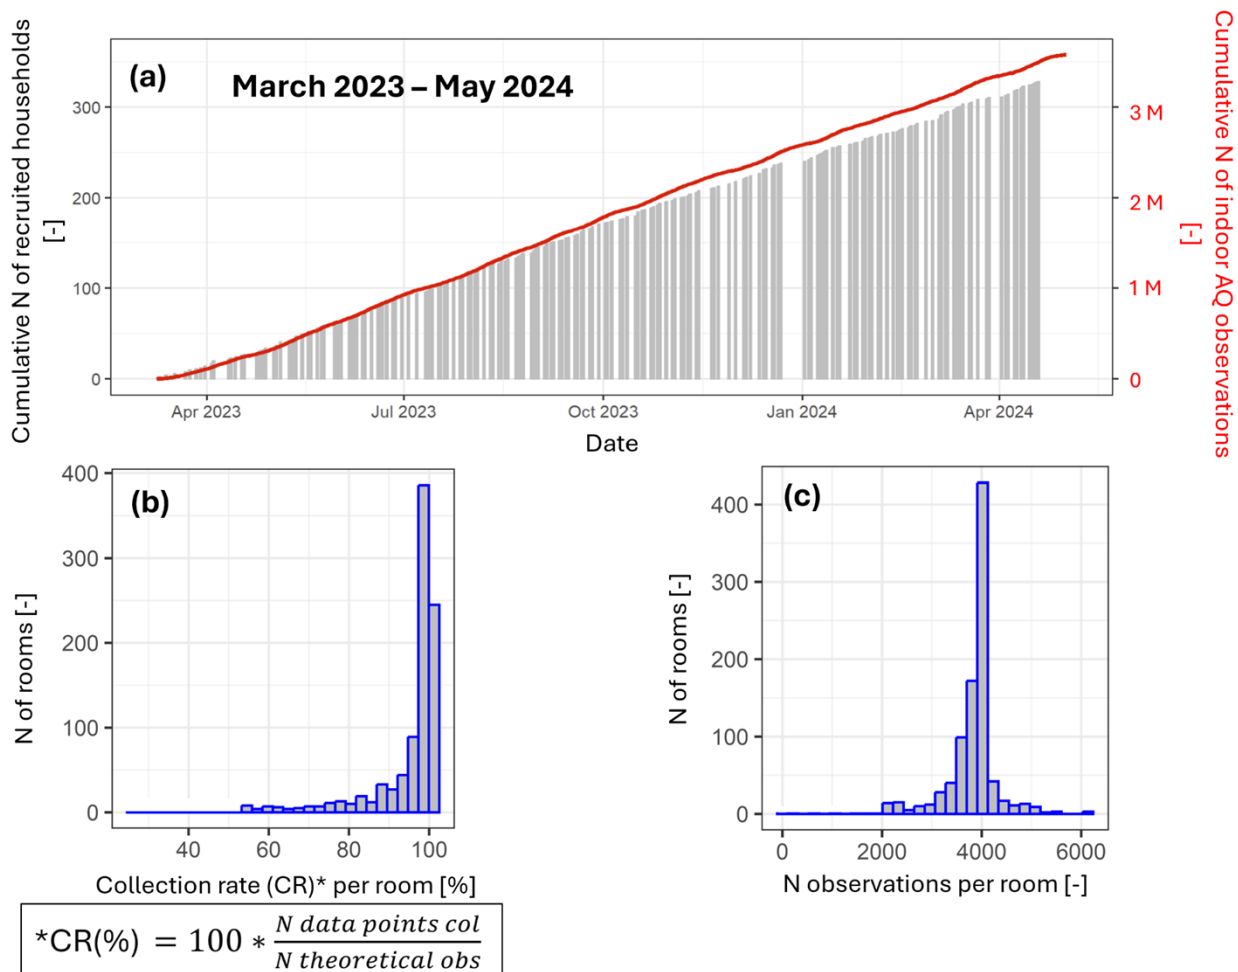

**Figure S1:** (a) Recruitment overview during the INGENIOUS sampling period (March 2023-May 2024) and for 315 households. A total of ~3.5 million indoor air quality measurements were collected. (b) The mean collection rate of indoor AQ observations was 93% with a median of 98%. Lower collection rates occurred in some households due to poor cellular connectivity. (c) Observations were collected for an average of 14 days per household at a 5-min interval, resulting in an average of ~4000 timestamped points per sampled room (3 rooms in each house).

Note that we measured in 3 rooms in each household (kitchen, living room, child's bedroom). For each room the collection rate (CR) was estimated as:

CR = 100\* (number of collected observations /number of theoretically possible observations).

For example, the number of theoretical observations that could be collected in a 14-day period at a 5-min interval in one room would be 12 (observations in an hour) \* 24 h \*14 days = 4032. If we collected 3,630 observations over this period, then the CR for this room would be 90%.

To ensure that the measurements were representative of the indoor environmental conditions, rooms in households were retained for further analysis if they fulfilled the following criteria:

- There were at least 7 valid days in the 14-day period ( $\Rightarrow$ 50% collection rate).
- A day was considered valid if there were at least 12 valid hours collected ( $\Rightarrow$ 50% collection rate).
- An hour was considered valid if there were at least 6 observations of the possible maximum of 12 maximum ( $\Rightarrow$ 50% collection rate).

**Table S2:** Input parameters for the INCHEM-Py model used in the simulation of Figure 5. Details of these model parameters can be found in Shaw et al., (2023).

| Settings parameter                                         | Value                                                               |
|------------------------------------------------------------|---------------------------------------------------------------------|
| Temperature (K)                                            | 293                                                                 |
| Relative humidity (%)                                      | 50                                                                  |
| Air change rate ( $\text{h}^{-1}$ )                        | 0.72                                                                |
| Outdoor concentration profile                              | Bergen urban                                                        |
| Date                                                       | 21-07-2020                                                          |
| Latitude ( $^{\circ}\text{N}$ )                            | 53.79                                                               |
| Indoor lighting profile                                    | LED, set to come on at 7am and off at 7pm                           |
| Glass attenuation profile for sunlight                     | Sacht glass C                                                       |
| Room volume ( $\text{cm}^3$ )                              | $2.176 \times 10^7$                                                 |
| Surface areas ( $\text{cm}^2$ )                            | Painted surfaces $3.936 \times 10^5$<br>Linoleum $9.46 \times 10^4$ |
| $\text{O}_3$ and $\text{H}_2\text{O}_2$ surface deposition | False                                                               |

Note that the species concentrations/mixing ratios used to constrain the model simulations shown in Figure 5 are a low-pass filter of the combined measurements from the multiple meal experiments.

### Additional References for SI

1. Air Gradient website (nd). <https://www.airgradient.com> last accessed October 17th, 2024.
